# Supplementary material for: Reliability and validity study of the Spanish adaptation of the “Student Satisfaction and Self-Confidence in Learning Scale” (SCLS)
Source: PLoS One. 2021 Jul 23;16(7):e0255188. doi: 10.1371/journal.pone.0255188 (PMC8301674; doi:10.1371/journal.pone.0255188)
Supplement: S1 File — (XLSX) [file pone.0255188.s001.xlsx]

## Sheet: Hoja1
Code	Age	Sex	Academic year	Study timetable	Currently employed	Years of grouped work experience	Healthcare work experience	Type of contract	Work shift	item 1	item 2	item 3	item 4	item 5	item 6	item 7	item 8	item 9	item 10	item 11	item 12	item 13
1	46	Female	second	afternoon	Yes	More than 6 years	Yes	temporary	mornings	strongly agree	strongly agree	strongly agree	agree	strongly agree	agree	strongly agree	strongly agree	strongly agree	agree	strongly agree	agree	strongly agree
2	21	Male	third	morning	Yes	2 - 4 years	Yes	permanent	afternoons	disagree	disagree	undecided	undecided	undecided	undecided	disagree	undecided	strongly disagree	disagree	undecided	disagree	agree
3	20	Female	second	morning	Yes	2 - 4 years	Yes	temporary	rotating	strongly agree	strongly agree	strongly agree	agree	undecided	strongly agree	agree	strongly agree	strongly agree	strongly agree	strongly agree	undecided	undecided
4	31	Male	third	afternoon	Yes	More than 6 years	No	permanent	mornings	agree	agree	agree	agree	agree	agree	agree	agree	agree	agree	disagree	agree	disagree
5	29	Female	third	afternoon	Yes	4 - 6 years	No	temporary	afternoons	disagree	agree	undecided	agree	disagree	undecided	agree	agree	agree	disagree	agree	agree	agree
6	20	Female	second	afternoon	Yes	2 - 4 years	No	temporary	mornings	agree	agree	strongly agree	agree	agree	agree	strongly agree	agree	strongly agree	strongly agree	agree	agree	strongly agree
7	19	Female	second	afternoon	Yes	Less than 2 years	No	temporary	mornings	agree	agree	agree	agree	agree	undecided	agree	undecided	agree	agree	agree	agree	strongly agree
8	20	Female	second	afternoon	Yes	2 - 4 years	No	permanent	rotating	strongly agree	agree	agree	agree	agree	undecided	agree	agree	agree	agree	undecided	undecided	agree
9	22	Female	second	afternoon	Yes	4 - 6 years	No	temporary	rotating	agree	strongly agree	agree	strongly agree	agree	undecided	strongly agree	agree	agree	agree	agree	agree	strongly agree
10	24	Female	second	afternoon	Yes	2 - 4 years	No	permanent	rotating	agree	agree	strongly agree	strongly agree	strongly agree	strongly agree	agree	agree	strongly agree	undecided	strongly agree	strongly agree	agree
11	19	Male	second	afternoon	Yes	Less than 2 years	No	temporary	rotating	agree	agree	agree	strongly agree	strongly agree	agree	agree	strongly agree	strongly agree	agree	undecided	agree	strongly agree
12	24	Female	second	afternoon	Yes	4 - 6 years	No	permanent	rotating	strongly agree	strongly agree	strongly agree	strongly agree	strongly agree	strongly agree	agree	strongly agree	strongly agree	strongly agree	strongly agree	strongly agree	strongly agree
13	19	Female	second	afternoon	Yes	Less than 2 years	No	temporary	afternoons	agree	strongly agree	agree	agree	strongly agree	agree	strongly agree	agree	strongly agree	undecided	agree	agree	strongly agree
14	21	Female	second	afternoon	Yes	4 - 6 years	No	temporary	mornings	agree	agree	agree	undecided	undecided	disagree	undecided	agree	undecided	undecided	disagree	undecided	agree
15	19	Female	second	afternoon	Yes	Less than 2 years	No	permanent	mornings	agree	agree	strongly agree	agree	strongly agree	undecided	agree	agree	agree	strongly agree	strongly agree	strongly agree	strongly agree
16	20	Female	second	afternoon	Yes	Less than 2 years	No	permanent	mornings	strongly agree	strongly agree	strongly agree	agree	strongly agree	agree	agree	agree	strongly agree	strongly agree	agree	strongly agree	agree
17	21	Female	second	afternoon	Yes	2 - 4 years	No	temporary	mornings	agree	agree	strongly agree	strongly agree	strongly agree	disagree	agree	undecided	agree	strongly agree	strongly agree	strongly agree	agree
18	19	Female	second	afternoon	Yes	4 - 6 years	No	temporary	mornings	strongly agree	strongly agree	strongly agree	strongly agree	strongly agree	agree	strongly agree	agree	strongly agree	strongly agree	strongly agree	strongly agree	undecided
19	19	Female	second	afternoon	Yes	Less than 2 years	No	temporary	nights	agree	strongly agree	agree	agree	agree	agree	agree	strongly agree	strongly agree	strongly agree	agree	agree	agree
20	19	Female	second	afternoon	Yes	2 - 4 years	No	permanent	mornings	agree	agree	strongly agree	agree	undecided	agree	undecided	agree	agree	strongly agree	strongly agree	agree	strongly agree
21	19	Female	second	afternoon	Yes	Less than 2 years	No	temporary	rotating	strongly agree	strongly agree	strongly agree	strongly agree	strongly agree	undecided	agree	agree	agree	agree	agree	agree	agree
22	18	Female	second	afternoon	Yes	Less than 2 years	No	temporary	mornings	agree	strongly agree	strongly agree	agree	agree	agree	strongly agree	strongly agree	agree	agree	strongly agree	agree	agree
23	19	Female	second	afternoon	Yes	Less than 2 years	No	temporary	rotating	strongly agree	strongly agree	strongly agree	strongly agree	strongly agree	agree	strongly agree	strongly agree	agree	agree	undecided	strongly agree	undecided
24	28	Male	second	afternoon	Yes	More than 6 years	No	permanent	mornings	strongly agree	strongly agree	agree	strongly agree	strongly agree	agree	agree	agree	agree	agree	agree	agree	agree
25	19	Female	second	afternoon	Yes	Less than 2 years	No	temporary	afternoons	strongly agree	strongly agree	strongly agree	strongly agree	strongly agree	strongly agree	strongly agree	strongly agree	strongly agree	strongly agree	strongly agree	agree	undecided
26	20	Female	second	afternoon	Yes	2 - 4 years	No	permanent	nights	agree	undecided	agree	agree	agree	strongly agree	strongly agree	agree	agree	agree	strongly agree	strongly agree	strongly agree
27	18	Female	second	afternoon	Yes	Less than 2 years	No	temporary	rotating	agree	agree	undecided	undecided	agree	agree	undecided	agree	agree	agree	agree	agree	agree
28	33	Female	third	afternoon	Yes	More than 6 years	No	temporary	mornings	agree	agree	strongly agree	strongly agree	strongly agree	strongly agree	undecided	undecided	strongly agree	strongly agree	strongly agree	strongly agree	strongly agree
29	22	Female	third	afternoon	Yes	2 - 4 years	No	temporary	rotating	agree	agree	agree	agree	agree	agree	agree	agree	agree	agree	agree	agree	agree
30	35	Female	third	afternoon	Yes	More than 6 years	No	permanent	mornings	agree	agree	agree	undecided	agree	undecided	strongly agree	agree	undecided	strongly agree	agree	agree	agree
31	21	Female	third	afternoon	Yes	4 - 6 years	No	temporary	mornings	agree	agree	undecided	undecided	agree	agree	agree	undecided	agree	undecided	agree	undecided	agree
32	20	Male	third	afternoon	Yes	Less than 2 years	No	temporary	afternoons	agree	agree	agree	agree	agree	disagree	undecided	disagree	agree	agree	agree	agree	strongly agree
33	30	Female	third	afternoon	Yes	More than 6 years	No	permanent	mornings	undecided	agree	undecided	agree	undecided	undecided	strongly agree	agree	agree	strongly agree	undecided	agree	strongly agree
34	29	Female	third	afternoon	Yes	More than 6 years	No	permanent	mornings	strongly agree	strongly agree	strongly agree	agree	agree	undecided	strongly agree	agree	agree	strongly agree	strongly agree	agree	disagree
35	33	Male	fourth	afternoon	Yes	More than 6 years	No	permanent	rotating	strongly agree	strongly agree	strongly agree	agree	strongly agree	agree	strongly agree	strongly agree	strongly agree	strongly agree	strongly agree	strongly agree	strongly agree
36	22	Female	fourth	afternoon	Yes	4 - 6 years	No	permanent	mornings	agree	agree	strongly agree	agree	agree	strongly agree	strongly agree	strongly agree	strongly agree	agree	strongly agree	strongly agree	agree
37	22	Female	fourth	afternoon	Yes	2 - 4 years	No	temporary	mornings	strongly agree	strongly agree	strongly agree	strongly agree	strongly agree	strongly agree	strongly agree	strongly agree	strongly agree	strongly agree	strongly agree	strongly agree	strongly agree
38	23	Female	fourth	afternoon	Yes	4 - 6 years	No	temporary	mornings	agree	strongly agree	strongly agree	agree	strongly agree	agree	agree	agree	strongly agree	agree	agree	agree	strongly agree
39	25	Female	fourth	afternoon	Yes	4 - 6 years	No	temporary	nights	agree	agree	undecided	strongly agree	strongly agree	strongly agree	agree	strongly agree	agree	agree	agree	undecided	strongly agree
40	21	Female	second	morning	Yes	2 - 4 years	No	temporary	afternoons	strongly agree	strongly agree	strongly agree	strongly agree	agree	undecided	undecided	undecided	strongly agree	agree	disagree	disagree	strongly agree
41	22	Female	second	morning	Yes	More than 6 years	No	temporary	rotating	strongly agree	strongly agree	strongly agree	strongly agree	strongly agree	agree	strongly agree	strongly agree	strongly agree	strongly agree	strongly agree	strongly agree	strongly agree
42	20	Female	second	morning	Yes	Less than 2 years	No	permanent	afternoons	agree	agree	agree	strongly agree	agree	undecided	agree	undecided	agree	agree	agree	agree	undecided
43	19	Female	second	morning	Yes	2 - 4 years	No	temporary	afternoons	strongly agree	strongly agree	undecided	undecided	undecided	strongly agree	strongly agree	strongly agree	strongly agree	strongly agree	undecided	strongly agree	strongly agree
44	20	Female	second	morning	Yes	2 - 4 years	No	temporary	afternoons	agree	agree	agree	strongly agree	agree	agree	strongly agree	strongly agree	agree	strongly agree	strongly agree	strongly agree	strongly agree
45	28	Female	second	morning	Yes	More than 6 years	No	permanent	afternoons	strongly agree	strongly agree	strongly agree	strongly agree	undecided	agree	agree	agree	agree	agree	strongly agree	agree	agree
46	20	Female	second	morning	Yes	Less than 2 years	No	permanent	afternoons	agree	agree	undecided	agree	agree	undecided	agree	undecided	disagree	undecided	agree	agree	agree
47	24	Male	second	morning	Yes	4 - 6 years	No	temporary	afternoons	strongly agree	strongly agree	strongly agree	strongly agree	agree	strongly agree	strongly agree	strongly agree	strongly agree	strongly agree	agree	agree	strongly agree
48	19	Female	second	morning	Yes	2 - 4 years	No	permanent	afternoons	strongly agree	strongly agree	strongly agree	strongly agree	strongly agree	undecided	strongly agree	strongly agree	strongly agree	strongly agree	strongly agree	strongly agree	strongly agree
49	19	Female	second	morning	Yes	Less than 2 years	No	temporary	afternoons	undecided	agree	agree	agree	undecided	undecided	disagree	agree	agree	agree	undecided	undecided	agree
50	20	Female	second	morning	Yes	4 - 6 years	No	temporary	afternoons	agree	strongly agree	agree	strongly agree	strongly agree	undecided	agree	agree	agree	strongly agree	strongly agree	agree	undecided
51	20	Female	second	morning	Yes	Less than 2 years	No	temporary	afternoons	strongly agree	strongly agree	agree	strongly agree	agree	undecided	strongly agree	agree	strongly agree	strongly agree	undecided	agree	strongly agree
52	19	Female	second	morning	Yes	Less than 2 years	No	permanent	afternoons	agree	agree	undecided	agree	undecided	undecided	agree	agree	undecided	agree	agree	agree	agree
53	37	Female	second	morning	Yes	More than 6 years	No	permanent	rotating	strongly agree	strongly agree	strongly agree	strongly agree	strongly agree	agree	strongly agree	strongly agree	agree	strongly agree	strongly agree	strongly agree	strongly agree
54	20	Female	second	morning	Yes	Less than 2 years	No	permanent	afternoons	agree	strongly agree	agree	agree	agree	undecided	strongly agree	agree	agree	agree	undecided	undecided	agree
55	19	Female	second	morning	Yes	2 - 4 years	No	permanent	afternoons	agree	agree	agree	agree	undecided	undecided	agree	agree	agree	agree	undecided	agree	agree
56	19	Female	second	morning	Yes	Less than 2 years	No	temporary	rotating	agree	agree	strongly agree	agree	strongly agree	agree	agree	agree	agree	agree	agree	agree	agree
57	19	Male	second	morning	Yes	2 - 4 years	No	temporary	afternoons	strongly agree	agree	strongly agree	strongly agree	strongly agree	agree	strongly agree	agree	strongly agree	agree	strongly agree	agree	agree
58	20	Male	second	morning	Yes	4 - 6 years	No	temporary	afternoons	strongly agree	agree	strongly agree	agree	strongly agree	agree	strongly agree	strongly agree	agree	undecided	agree	agree	undecided
59	20	Female	second	morning	Yes	2 - 4 years	No	permanent	afternoons	strongly agree	strongly agree	strongly agree	strongly agree	agree	undecided	strongly agree	strongly agree	strongly agree	undecided	agree	agree	agree
60	19	Male	second	morning	Yes	Less than 2 years	No	permanent	afternoons	disagree	undecided	strongly agree	agree	strongly agree	undecided	undecided	disagree	undecided	agree	undecided	agree	strongly agree
61	19	Male	second	morning	Yes	Less than 2 years	No	temporary	mornings	disagree	undecided	strongly agree	agree	strongly agree	undecided	undecided	disagree	undecided	agree	agree	disagree	undecided
62	19	Female	second	morning	Yes	Less than 2 years	No	temporary	afternoons	agree	agree	strongly agree	undecided	agree	agree	strongly agree	strongly agree	strongly agree	agree	agree	agree	agree
63	19	Female	second	morning	Yes	4 - 6 years	No	permanent	afternoons	agree	strongly agree	strongly agree	strongly agree	agree	agree	agree	agree	agree	agree	agree	strongly agree	agree
64	21	Female	second	morning	Yes	2 - 4 years	No	permanent	afternoons	agree	agree	undecided	disagree	agree	undecided	agree	disagree	undecided	agree	agree	agree	strongly agree
65	21	Male	second	morning	Yes	4 - 6 years	No	permanent	afternoons	agree	strongly agree	strongly agree	strongly agree	strongly agree	strongly agree	agree	strongly agree	strongly agree	agree	strongly agree	strongly agree	agree
66	19	Female	second	morning	Yes	Less than 2 years	No	temporary	afternoons	strongly agree	strongly agree	strongly agree	agree	agree	agree	agree	strongly agree	strongly agree	strongly agree	agree	agree	strongly agree
67	19	Female	second	morning	Yes	2 - 4 years	No	permanent	afternoons	strongly agree	strongly agree	strongly agree	strongly agree	strongly agree	agree	strongly agree	strongly agree	strongly agree	strongly agree	strongly agree	strongly agree	strongly agree
68	19	Female	second	morning	Yes	2 - 4 years	No	temporary	afternoons	strongly agree	agree	strongly agree	agree	disagree	undecided	strongly agree	agree	agree	strongly agree	strongly agree	agree	strongly agree
69	24	Female	second	morning	Yes	4 - 6 years	No	permanent	afternoons	strongly agree	strongly agree	strongly agree	strongly agree	strongly agree	agree	agree	agree	strongly agree	agree	agree	agree	agree
70	26	Female	second	morning	Yes	More than 6 years	No	temporary	rotating	strongly agree	strongly agree	undecided	strongly agree	agree	agree	strongly agree	strongly agree	agree	strongly agree	agree	agree	agree
71	22	Female	third	morning	Yes	2 - 4 years	No	permanent	nights	agree	agree	agree	strongly agree	strongly agree	undecided	strongly agree	strongly agree	strongly agree	strongly agree	undecided	agree	agree
72	22	Female	third	morning	Yes	Less than 2 years	No	permanent	rotating	agree	agree	agree	agree	agree	undecided	agree	strongly agree	agree	strongly agree	agree	undecided	strongly agree
73	22	Female	third	morning	Yes	4 - 6 years	No	temporary	rotating	strongly agree	strongly agree	strongly agree	strongly agree	strongly agree	agree	agree	strongly agree	undecided	strongly agree	strongly agree	strongly agree	strongly agree
74	21	Male	third	morning	Yes	Less than 2 years	No	permanent	afternoons	disagree	agree	strongly agree	strongly agree	agree	strongly agree	agree	strongly agree	strongly agree	strongly agree	agree	strongly agree	strongly agree
75	21	Female	third	morning	Yes	Less than 2 years	No	permanent	afternoons	agree	strongly agree	undecided	agree	agree	undecided	strongly agree	agree	agree	strongly agree	undecided	undecided	agree
76	22	Female	third	morning	Yes	2 - 4 years	No	temporary	afternoons	strongly agree	strongly agree	strongly agree	strongly agree	strongly agree	agree	strongly agree	strongly agree	strongly agree	undecided	strongly agree	strongly agree	strongly agree
77	20	Female	third	morning	Yes	2 - 4 years	No	permanent	afternoons	agree	agree	agree	agree	agree	agree	strongly agree	agree	agree	strongly agree	agree	agree	strongly agree
78	20	Female	third	morning	Yes	Less than 2 years	No	temporary	afternoons	strongly agree	agree	strongly agree	strongly agree	strongly agree	agree	strongly agree	strongly agree	agree	agree	agree	strongly agree	strongly agree
79	23	Male	third	morning	Yes	2 - 4 years	No	permanent	afternoons	agree	agree	agree	agree	agree	agree	agree	agree	agree	agree	agree	agree	agree
80	20	Female	third	morning	Yes	2 - 4 years	No	temporary	afternoons	agree	agree	strongly agree	strongly agree	strongly agree	agree	strongly agree	strongly agree	strongly agree	undecided	agree	agree	strongly agree
81	21	Female	third	morning	Yes	4 - 6 years	No	permanent	mornings	strongly agree	strongly agree	strongly agree	strongly agree	strongly agree	agree	strongly agree	strongly agree	strongly agree	strongly agree	strongly agree	strongly agree	strongly agree
82	21	Female	third	morning	Yes	4 - 6 years	No	permanent	afternoons	agree	undecided	agree	agree	undecided	agree	agree	undecided	undecided	agree	agree	undecided	agree
83	23	Female	third	morning	Yes	More than 6 years	No	temporary	rotating	strongly agree	agree	agree	agree	agree	undecided	agree	agree	agree	agree	agree	agree	agree
84	21	Female	third	morning	Yes	2 - 4 years	No	temporary	afternoons	agree	agree	agree	agree	agree	undecided	agree	agree	agree	agree	agree	agree	agree
85	21	Female	third	morning	Yes	2 - 4 years	No	permanent	afternoons	agree	agree	undecided	undecided	strongly agree	agree	strongly agree	strongly agree	agree	strongly agree	agree	strongly agree	agree
86	21	Male	third	morning	Yes	2 - 4 years	No	temporary	afternoons	strongly agree	strongly agree	strongly agree	strongly agree	strongly agree	strongly agree	strongly agree	strongly agree	strongly agree	strongly agree	strongly agree	strongly agree	strongly agree
87	28	Female	third	morning	Yes	More than 6 years	No	permanent	afternoons	agree	agree	agree	agree	agree	undecided	agree	agree	agree	strongly agree	agree	agree	agree
88	22	Female	fourth	morning	Yes	4 - 6 years	No	permanent	nights	agree	agree	agree	agree	agree	undecided	agree	undecided	agree	undecided	agree	agree	undecided
89	21	Female	fourth	morning	Yes	Less than 2 years	No	temporary	afternoons	agree	agree	agree	strongly agree	agree	agree	undecided	agree	undecided	agree	agree	strongly agree	agree
90	24	Female	fourth	morning	Yes	4 - 6 years	No	permanent	afternoons	agree	agree	agree	agree	agree	agree	agree	agree	strongly agree	agree	agree	agree	agree
91	24	Female	fourth	morning	Yes	More than 6 years	No	permanent	afternoons	agree	agree	agree	agree	agree	agree	agree	agree	agree	agree	agree	agree	agree
92	22	Female	fourth	morning	Yes	2 - 4 years	No	temporary	afternoons	agree	agree	agree	agree	undecided	agree	agree	agree	agree	strongly agree	agree	undecided	agree
93	28	Female	fourth	morning	Yes	More than 6 years	No	permanent	afternoons	agree	agree	agree	agree	undecided	undecided	agree	agree	agree	undecided	undecided	agree	agree
94	23	Male	fourth	morning	Yes	2 - 4 years	No	permanent	afternoons	agree	undecided	agree	agree	agree	agree	agree	agree	strongly agree	undecided	strongly agree	strongly agree	undecided
95	21	Female	fourth	morning	Yes	Less than 2 years	No	permanent	afternoons	strongly agree	strongly agree	strongly agree	strongly agree	strongly agree	agree	strongly agree	strongly agree	strongly agree	strongly agree	strongly agree	strongly agree	strongly agree
96	22	Female	fourth	morning	Yes	2 - 4 years	No	temporary	afternoons	agree	agree	strongly agree	agree	undecided	undecided	strongly agree	agree	agree	strongly agree	strongly agree	undecided	strongly agree
97	23	Female	fourth	morning	Yes	4 - 6 years	No	temporary	afternoons	agree	agree	agree	agree	agree	undecided	strongly agree	undecided	strongly agree	undecided	strongly agree	agree	strongly agree
98	24	Male	fourth	morning	Yes	4 - 6 years	No	temporary	rotating	agree	strongly agree	undecided	undecided	agree	agree	strongly agree	undecided	agree	undecided	agree	undecided	agree
99	25	Female	fourth	morning	Yes	More than 6 years	No	temporary	mornings	strongly agree	strongly agree	agree	strongly agree	strongly agree	strongly agree	strongly agree	agree	agree	strongly agree	strongly agree	strongly agree	strongly agree
100	24	Female	fourth	morning	Yes	Less than 2 years	No	temporary	afternoons	agree	agree	agree	disagree	agree	agree	agree	agree	strongly agree	agree	undecided	undecided	strongly agree
101	27	Male	second	afternoon	Yes	Less than 2 years	Yes	permanent	mornings	agree	strongly agree	agree	agree	undecided	undecided	strongly agree	agree	agree	strongly agree	strongly agree	agree	agree
102	20	Male	third	afternoon	Yes	2 - 4 years	Yes	temporary	afternoons	agree	agree	agree	agree	undecided	agree	agree	agree	strongly agree	agree	strongly agree	strongly agree	strongly agree
103	23	Female	second	afternoon	Yes	Less than 2 years	Yes	temporary	mornings	agree	agree	strongly agree	agree	agree	disagree	disagree	agree	agree	agree	agree	undecided	strongly agree
104	19	Female	second	afternoon	Yes	Less than 2 years	Yes	temporary	mornings	strongly agree	strongly agree	agree	agree	agree	undecided	strongly agree	strongly agree	strongly agree	agree	agree	agree	agree
105	27	Female	second	afternoon	Yes	More than 6 years	Yes	permanent	nights	agree	agree	agree	agree	agree	strongly agree	agree	undecided	strongly agree	undecided	agree	undecided	agree
106	26	Female	second	afternoon	Yes	More than 6 years	Yes	temporary	rotating	agree	agree	agree	undecided	agree	disagree	agree	undecided	agree	undecided	undecided	agree	agree
107	27	Female	second	afternoon	Yes	More than 6 years	Yes	permanent	nights	agree	agree	agree	agree	agree	agree	agree	agree	strongly agree	undecided	agree	agree	agree
108	19	Female	second	afternoon	Yes	Less than 2 years	Yes	temporary	mornings	agree	agree	agree	undecided	agree	agree	agree	agree	agree	agree	agree	agree	undecided
109	40	Female	second	afternoon	Yes	More than 6 years	Yes	permanent	mornings	agree	strongly agree	undecided	agree	undecided	agree	strongly agree	strongly agree	undecided	strongly agree	strongly agree	agree	agree
110	20	Male	second	afternoon	Yes	Less than 2 years	Yes	temporary	rotating	strongly agree	strongly agree	strongly agree	strongly agree	strongly agree	strongly agree	strongly agree	strongly agree	agree	strongly agree	agree	agree	agree
111	37	Female	second	afternoon	Yes	More than 6 years	Yes	permanent	mornings	agree	agree	strongly agree	agree	strongly agree	undecided	agree	agree	strongly agree	undecided	undecided	undecided	strongly agree
112	26	Female	second	afternoon	Yes	4 - 6 years	Yes	permanent	nights	disagree	strongly agree	agree	agree	disagree	strongly agree	strongly agree	agree	agree	agree	disagree	agree	strongly agree
113	27	Female	second	afternoon	Yes	4 - 6 years	Yes	permanent	mornings	agree	agree	agree	strongly agree	strongly agree	undecided	strongly agree	strongly agree	agree	agree	agree	agree	strongly agree
114	42	Male	second	afternoon	Yes	More than 6 years	Yes	permanent	mornings	agree	strongly agree	agree	agree	agree	undecided	agree	agree	agree	strongly agree	agree	agree	agree
115	26	Female	second	afternoon	Yes	More than 6 years	Yes	permanent	mornings	strongly agree	strongly agree	agree	strongly agree	agree	agree	strongly agree	strongly agree	agree	agree	strongly agree	strongly agree	strongly agree
116	40	Male	second	afternoon	Yes	More than 6 years	Yes	permanent	rotating	agree	undecided	agree	agree	strongly agree	agree	agree	agree	undecided	agree	strongly agree	undecided	undecided
117	42	Female	second	afternoon	Yes	More than 6 years	Yes	permanent	mornings	agree	undecided	agree	agree	agree	agree	agree	agree	agree	strongly agree	strongly agree	agree	agree
118	21	Male	second	afternoon	Yes	2 - 4 years	Yes	temporary	mornings	strongly agree	strongly agree	strongly agree	strongly agree	strongly agree	strongly agree	strongly agree	strongly agree	strongly agree	strongly agree	strongly agree	strongly agree	strongly agree
119	21	Female	second	afternoon	Yes	4 - 6 years	Yes	temporary	rotating	strongly agree	strongly agree	strongly agree	strongly agree	strongly agree	agree	strongly agree	strongly agree	strongly agree	strongly agree	strongly agree	strongly agree	agree
120	20	Female	second	afternoon	Yes	4 - 6 years	Yes	temporary	mornings	strongly agree	strongly agree	agree	agree	strongly agree	agree	strongly agree	strongly agree	agree	agree	agree	agree	undecided
121	21	Female	second	afternoon	Yes	Less than 2 years	Yes	temporary	afternoons	agree	strongly agree	strongly agree	agree	agree	agree	strongly agree	strongly agree	strongly agree	strongly agree	agree	agree	agree
122	22	Female	second	afternoon	Yes	4 - 6 years	Yes	temporary	nights	strongly agree	strongly agree	agree	strongly agree	agree	agree	strongly agree	agree	strongly agree	agree	agree	agree	agree
123	28	Female	second	afternoon	Yes	More than 6 years	Yes	permanent	mornings	strongly agree	strongly agree	agree	strongly agree	agree	agree	agree	agree	agree	agree	agree	agree	agree
124	26	Female	third	afternoon	Yes	More than 6 years	Yes	permanent	mornings	agree	agree	strongly agree	strongly agree	strongly agree	agree	agree	agree	agree	agree	agree	agree	agree
125	39	Male	third	afternoon	Yes	More than 6 years	Yes	permanent	nights	agree	agree	agree	agree	agree	undecided	strongly agree	strongly agree	strongly agree	strongly agree	strongly agree	strongly agree	agree
126	21	Female	third	afternoon	Yes	Less than 2 years	Yes	temporary	mornings	agree	agree	agree	agree	agree	agree	agree	agree	agree	strongly agree	strongly agree	strongly agree	agree
127	20	Female	third	afternoon	Yes	2 - 4 years	Yes	temporary	mornings	strongly agree	strongly agree	strongly agree	strongly agree	agree	agree	strongly agree	agree	strongly agree	undecided	agree	agree	agree
128	22	Female	third	afternoon	Yes	Less than 2 years	Yes	temporary	rotating	disagree	disagree	strongly disagree	undecided	strongly disagree	agree	undecided	disagree	disagree	agree	strongly agree	agree	agree
129	26	Female	third	afternoon	Yes	More than 6 years	Yes	temporary	nights	undecided	undecided	undecided	disagree	undecided	undecided	disagree	undecided	strongly disagree	strongly agree	strongly agree	agree	undecided
130	24	Female	third	afternoon	Yes	4 - 6 years	Yes	temporary	mornings	strongly disagree	undecided	undecided	disagree	disagree	strongly disagree	undecided	undecided	agree	agree	disagree	strongly disagree	agree
131	23	Female	third	afternoon	Yes	4 - 6 years	Yes	temporary	rotating	agree	agree	agree	agree	agree	undecided	agree	undecided	agree	strongly agree	strongly agree	agree	agree
132	25	Male	third	afternoon	Yes	4 - 6 years	Yes	permanent	nights	strongly agree	strongly agree	strongly agree	strongly agree	strongly agree	agree	agree	agree	agree	agree	agree	agree	agree
133	21	Female	third	afternoon	Yes	2 - 4 years	Yes	temporary	rotating	strongly agree	strongly agree	agree	strongly agree	agree	strongly agree	strongly agree	agree	agree	undecided	undecided	agree	strongly agree
134	45	Female	third	afternoon	Yes	More than 6 years	Yes	permanent	mornings	strongly agree	agree	strongly agree	strongly agree	strongly agree	agree	strongly agree	strongly agree	agree	strongly agree	agree	undecided	strongly agree
135	22	Female	third	afternoon	Yes	Less than 2 years	Yes	temporary	rotating	agree	agree	agree	undecided	undecided	agree	agree	agree	undecided	strongly agree	agree	agree	agree
136	22	Male	third	afternoon	Yes	Less than 2 years	Yes	temporary	rotating	agree	agree	agree	agree	agree	agree	agree	agree	undecided	agree	undecided	agree	agree
137	21	Female	third	afternoon	Yes	Less than 2 years	Yes	temporary	mornings	undecided	undecided	undecided	agree	disagree	agree	strongly agree	agree	undecided	agree	undecided	agree	undecided
138	30	Female	third	afternoon	Yes	More than 6 years	Yes	permanent	rotating	agree	strongly agree	agree	agree	agree	agree	strongly agree	strongly agree	agree	strongly agree	agree	agree	strongly agree
139	30	Female	third	afternoon	Yes	More than 6 years	Yes	temporary	rotating	agree	agree	agree	agree	agree	disagree	agree	agree	agree	agree	disagree	undecided	strongly agree
140	40	Female	third	afternoon	Yes	More than 6 years	Yes	permanent	mornings	agree	agree	agree	agree	agree	agree	agree	agree	agree	strongly agree	strongly agree	agree	agree
141	26	Female	third	afternoon	Yes	More than 6 years	Yes	temporary	nights	agree	agree	agree	agree	agree	agree	agree	agree	agree	strongly agree	strongly agree	agree	agree
142	25	Female	third	afternoon	Yes	More than 6 years	Yes	temporary	rotating	agree	agree	undecided	agree	disagree	agree	agree	agree	undecided	agree	agree	agree	agree
143	22	Female	third	afternoon	Yes	4 - 6 years	Yes	temporary	mornings	agree	agree	undecided	undecided	agree	agree	undecided	agree	agree	strongly agree	agree	strongly agree	agree
144	24	Female	third	afternoon	Yes	4 - 6 years	Yes	temporary	mornings	agree	agree	agree	agree	strongly agree	agree	strongly agree	agree	strongly agree	strongly agree	strongly agree	strongly agree	agree
145	21	Female	third	afternoon	Yes	2 - 4 years	Yes	permanent	rotating	agree	strongly agree	strongly agree	agree	agree	agree	agree	undecided	undecided	strongly agree	agree	agree	agree
146	29	Female	fourth	afternoon	Yes	More than 6 years	Yes	permanent	mornings	strongly agree	strongly agree	strongly agree	strongly agree	strongly agree	agree	strongly agree	strongly agree	agree	strongly agree	strongly agree	agree	agree
147	22	Female	fourth	afternoon	Yes	2 - 4 years	Yes	temporary	rotating	agree	agree	agree	agree	agree	agree	agree	agree	strongly agree	agree	agree	agree	agree
148	26	Male	fourth	afternoon	Yes	2 - 4 years	Yes	permanent	mornings	strongly agree	agree	strongly agree	agree	strongly agree	agree	strongly agree	agree	agree	agree	undecided	agree	agree
149	38	Male	fourth	afternoon	Yes	More than 6 years	Yes	temporary	rotating	agree	agree	agree	strongly disagree	agree	strongly disagree	strongly disagree	agree	agree	agree	agree	strongly disagree	undecided
150	23	Male	fourth	afternoon	Yes	Less than 2 years	Yes	temporary	afternoons	strongly agree	agree	agree	undecided	agree	strongly agree	agree	agree	strongly agree	agree	undecided	agree	strongly agree
151	36	Female	fourth	afternoon	Yes	More than 6 years	Yes	permanent	nights	strongly agree	strongly agree	strongly agree	strongly agree	strongly agree	strongly agree	strongly agree	strongly agree	strongly agree	strongly agree	strongly agree	strongly agree	agree
152	23	Female	fourth	afternoon	Yes	2 - 4 years	Yes	permanent	afternoons	strongly agree	agree	undecided	strongly agree	undecided	strongly agree	undecided	agree	undecided	agree	disagree	undecided	undecided
153	42	Female	fourth	afternoon	Yes	More than 6 years	Yes	permanent	nights	strongly agree	agree	strongly agree	strongly agree	agree	agree	agree	strongly agree	agree	strongly agree	agree	agree	agree
154	26	Male	fourth	afternoon	Yes	More than 6 years	Yes	temporary	rotating	agree	strongly agree	agree	disagree	agree	agree	undecided	agree	agree	strongly agree	agree	agree	undecided
155	23	Female	fourth	afternoon	Yes	More than 6 years	Yes	permanent	mornings	strongly agree	strongly agree	strongly agree	strongly agree	undecided	agree	strongly agree	strongly agree	agree	strongly agree	agree	strongly agree	strongly agree
156	21	Male	fourth	afternoon	Yes	Less than 2 years	Yes	temporary	rotating	strongly agree	agree	agree	undecided	agree	agree	strongly agree	strongly agree	agree	agree	undecided	agree	undecided
157	29	Male	fourth	afternoon	Yes	More than 6 years	Yes	permanent	mornings	agree	undecided	strongly agree	undecided	agree	agree	undecided	agree	agree	undecided	agree	agree	agree
158	27	Female	fourth	afternoon	Yes	4 - 6 years	Yes	permanent	mornings	strongly agree	strongly agree	strongly agree	strongly agree	strongly agree	undecided	agree	agree	agree	agree	strongly agree	strongly agree	agree
159	30	Female	fourth	afternoon	Yes	More than 6 years	Yes	permanent	nights	agree	agree	agree	agree	agree	agree	agree	agree	agree	undecided	undecided	undecided	agree
160	43	Female	fourth	afternoon	Yes	More than 6 years	Yes	permanent	nights	agree	agree	agree	disagree	agree	agree	strongly agree	agree	undecided	strongly agree	strongly agree	strongly agree	strongly agree
161	25	Male	fourth	afternoon	Yes	2 - 4 years	Yes	temporary	rotating	strongly agree	agree	strongly agree	agree	agree	agree	strongly agree	agree	strongly agree	strongly agree	strongly agree	strongly agree	strongly agree
162	27	Male	fourth	afternoon	Yes	More than 6 years	Yes	permanent	mornings	disagree	agree	undecided	agree	agree	agree	agree	strongly agree	agree	strongly agree	agree	agree	strongly agree
163	24	Female	fourth	afternoon	Yes	4 - 6 years	Yes	temporary	mornings	agree	agree	agree	agree	agree	undecided	agree	undecided	agree	agree	agree	agree	agree
164	26	Female	fourth	afternoon	Yes	4 - 6 years	Yes	temporary	nights	agree	agree	agree	agree	agree	agree	agree	agree	agree	agree	agree	agree	agree
165	32	Male	fourth	afternoon	Yes	More than 6 years	Yes	permanent	nights	agree	agree	agree	agree	agree	agree	agree	agree	agree	agree	strongly agree	agree	agree
166	25	Female	fourth	afternoon	Yes	More than 6 years	Yes	permanent	mornings	agree	agree	agree	agree	agree	agree	agree	agree	agree	agree	agree	agree	agree
167	30	Female	fourth	afternoon	Yes	More than 6 years	Yes	permanent	mornings	strongly agree	strongly agree	strongly agree	strongly agree	strongly agree	agree	strongly agree	strongly agree	strongly agree	agree	agree	agree	undecided
168	24	Female	fourth	afternoon	Yes	2 - 4 years	Yes	temporary	mornings	strongly agree	strongly agree	agree	agree	agree	agree	agree	agree	agree	agree	agree	agree	agree
169	32	Female	fourth	afternoon	Yes	More than 6 years	Yes	permanent	rotating	agree	agree	strongly agree	agree	strongly agree	agree	agree	strongly agree	agree	strongly agree	strongly agree	agree	agree
170	21	Female	fourth	afternoon	Yes	More than 6 years	Yes	temporary	mornings	strongly agree	strongly agree	agree	undecided	strongly agree	strongly agree	strongly agree	strongly agree	agree	strongly agree	agree	strongly agree	agree
171	22	Female	fourth	afternoon	Yes	4 - 6 years	Yes	temporary	rotating	agree	agree	strongly agree	agree	strongly agree	agree	strongly agree	strongly agree	strongly agree	agree	strongly agree	strongly agree	agree
172	26	Female	fourth	afternoon	Yes	More than 6 years	Yes	temporary	rotating	agree	agree	strongly agree	agree	agree	agree	agree	strongly agree	agree	strongly agree	strongly agree	agree	strongly agree
173	28	Female	fourth	afternoon	Yes	More than 6 years	Yes	permanent	mornings	strongly agree	agree	strongly agree	agree	strongly agree	agree	strongly agree	agree	agree	strongly agree	undecided	agree	strongly agree
174	34	Female	second	morning	Yes	More than 6 years	Yes	permanent	nights	agree	agree	strongly agree	agree	agree	agree	agree	strongly agree	agree	agree	agree	agree	strongly agree
175	23	Female	second	morning	Yes	2 - 4 years	Yes	temporary	afternoons	agree	strongly agree	agree	agree	strongly agree	agree	strongly agree	undecided	agree	agree	agree	agree	agree
176	23	Male	second	morning	Yes	Less than 2 years	Yes	temporary	afternoons	agree	strongly agree	strongly agree	agree	strongly agree	agree	strongly agree	agree	agree	agree	strongly agree	strongly agree	agree
177	19	Female	second	morning	Yes	Less than 2 years	Yes	permanent	afternoons	agree	strongly agree	agree	undecided	agree	undecided	agree	agree	strongly agree	undecided	agree	agree	undecided
178	23	Male	second	morning	Yes	2 - 4 years	Yes	permanent	mornings	agree	agree	agree	agree	agree	agree	agree	agree	agree	strongly agree	agree	agree	strongly agree
179	20	Female	second	morning	Yes	2 - 4 years	Yes	permanent	afternoons	agree	strongly agree	strongly agree	strongly agree	strongly agree	agree	strongly agree	strongly agree	strongly agree	agree	undecided	undecided	strongly agree
180	39	Male	second	morning	Yes	More than 6 years	Yes	permanent	rotating	disagree	undecided	strongly agree	undecided	strongly agree	disagree	disagree	disagree	agree	undecided	undecided	disagree	agree
181	21	Female	second	morning	Yes	2 - 4 years	Yes	temporary	afternoons	strongly agree	strongly agree	strongly agree	agree	agree	agree	agree	strongly agree	strongly agree	undecided	strongly agree	agree	strongly agree
182	22	Female	second	morning	Yes	More than 6 years	Yes	permanent	afternoons	agree	agree	agree	agree	agree	agree	undecided	undecided	agree	strongly agree	agree	agree	agree
183	22	Male	second	morning	Yes	2 - 4 years	Yes	temporary	afternoons	agree	agree	agree	strongly agree	agree	undecided	strongly agree	strongly agree	agree	strongly agree	agree	agree	disagree
184	24	Female	second	morning	Yes	2 - 4 years	Yes	permanent	rotating	strongly agree	strongly agree	strongly agree	strongly agree	agree	agree	strongly agree	strongly agree	strongly agree	strongly agree	strongly agree	strongly agree	strongly agree
185	19	Female	second	morning	Yes	4 - 6 years	Yes	temporary	rotating	agree	agree	strongly agree	strongly agree	agree	undecided	strongly agree	agree	agree	strongly agree	agree	agree	strongly agree
186	25	Female	second	morning	Yes	More than 6 years	Yes	permanent	rotating	agree	agree	agree	agree	agree	agree	strongly agree	strongly agree	agree	strongly agree	strongly agree	strongly agree	agree
187	20	Female	second	morning	Yes	Less than 2 years	Yes	temporary	afternoons	agree	undecided	agree	agree	agree	undecided	strongly agree	strongly agree	agree	agree	undecided	strongly agree	agree
188	22	Female	second	morning	Yes	2 - 4 years	Yes	temporary	afternoons	agree	agree	agree	agree	agree	agree	agree	agree	agree	strongly agree	strongly agree	strongly agree	undecided
189	24	Female	second	morning	Yes	More than 6 years	Yes	permanent	mornings	agree	agree	agree	agree	agree	strongly agree	agree	strongly agree	agree	agree	agree	agree	agree
190	34	Female	second	morning	Yes	More than 6 years	Yes	permanent	rotating	agree	agree	agree	agree	agree	agree	agree	agree	agree	agree	agree	agree	agree
191	32	Female	second	morning	Yes	More than 6 years	Yes	permanent	nights	agree	agree	agree	agree	agree	agree	strongly agree	strongly agree	agree	strongly agree	agree	agree	strongly agree
192	23	Male	second	morning	Yes	4 - 6 years	Yes	permanent	rotating	strongly agree	agree	strongly agree	agree	agree	strongly agree	strongly agree	agree	strongly agree	strongly agree	undecided	strongly agree	strongly agree
193	22	Female	second	morning	Yes	4 - 6 years	Yes	temporary	rotating	strongly agree	strongly agree	strongly agree	strongly agree	strongly agree	agree	strongly agree	strongly agree	strongly agree	strongly agree	strongly agree	strongly agree	strongly agree
194	22	Female	second	morning	Yes	4 - 6 years	Yes	temporary	afternoons	strongly agree	strongly agree	strongly agree	strongly agree	strongly agree	agree	strongly agree	strongly agree	strongly agree	strongly agree	agree	strongly agree	strongly agree
195	20	Female	second	morning	Yes	2 - 4 years	Yes	temporary	rotating	strongly agree	agree	strongly agree	agree	agree	agree	strongly agree	agree	strongly agree	agree	agree	strongly agree	strongly agree
196	33	Male	second	morning	Yes	More than 6 years	Yes	temporary	rotating	agree	strongly agree	agree	strongly agree	strongly agree	undecided	strongly agree	agree	agree	strongly agree	agree	agree	disagree
197	22	Female	second	morning	Yes	Less than 2 years	Yes	temporary	afternoons	strongly agree	strongly agree	strongly agree	strongly agree	strongly agree	strongly agree	strongly agree	strongly agree	strongly agree	strongly agree	strongly agree	strongly agree	strongly agree
198	26	Female	second	morning	Yes	4 - 6 years	Yes	permanent	afternoons	strongly agree	strongly agree	strongly agree	strongly agree	strongly agree	strongly agree	strongly agree	strongly agree	strongly agree	strongly agree	strongly agree	strongly agree	strongly agree
199	24	Female	second	morning	Yes	4 - 6 years	Yes	permanent	afternoons	strongly agree	agree	strongly agree	strongly agree	strongly agree	agree	strongly agree	strongly agree	strongly agree	agree	undecided	agree	disagree
200	22	Female	second	morning	Yes	4 - 6 years	Yes	permanent	mornings	strongly agree	strongly agree	strongly agree	strongly agree	strongly agree	agree	strongly agree	strongly agree	strongly agree	strongly agree	agree	strongly agree	agree
201	22	Female	second	morning	Yes	4 - 6 years	Yes	temporary	mornings	strongly agree	strongly agree	strongly agree	strongly agree	strongly agree	strongly agree	strongly agree	strongly agree	strongly agree	strongly agree	strongly agree	strongly agree	strongly agree
202	21	Female	second	morning	Yes	Less than 2 years	Yes	temporary	rotating	strongly agree	strongly agree	agree	strongly agree	strongly agree	strongly agree	strongly agree	agree	strongly agree	agree	strongly agree	strongly agree	agree
203	22	Female	second	morning	Yes	More than 6 years	Yes	temporary	rotating	strongly agree	strongly agree	strongly agree	strongly agree	strongly agree	strongly agree	strongly agree	strongly agree	strongly agree	strongly agree	agree	strongly agree	agree
204	23	Female	second	morning	Yes	4 - 6 years	Yes	temporary	nights	strongly agree	strongly agree	strongly agree	agree	strongly agree	strongly agree	strongly agree	strongly agree	strongly agree	agree	agree	agree	strongly agree
205	22	Female	third	morning	Yes	2 - 4 years	Yes	temporary	rotating	agree	agree	agree	agree	strongly agree	undecided	strongly agree	strongly agree	agree	strongly agree	undecided	agree	agree
206	24	Female	third	morning	Yes	2 - 4 years	Yes	temporary	nights	undecided	agree	disagree	agree	undecided	undecided	agree	undecided	agree	agree	agree	agree	agree
207	30	Male	third	morning	Yes	More than 6 years	Yes	permanent	afternoons	agree	strongly agree	strongly agree	strongly agree	strongly agree	agree	agree	agree	strongly agree	agree	strongly agree	agree	agree
208	27	Female	third	morning	Yes	More than 6 years	Yes	permanent	afternoons	agree	strongly agree	strongly agree	strongly agree	strongly agree	agree	strongly agree	strongly agree	strongly agree	strongly agree	strongly agree	strongly agree	strongly agree
209	25	Female	third	morning	Yes	4 - 6 years	Yes	temporary	mornings	agree	agree	agree	undecided	agree	disagree	agree	agree	agree	undecided	disagree	disagree	agree
210	22	Female	third	morning	Yes	4 - 6 years	Yes	temporary	rotating	agree	strongly agree	agree	strongly agree	agree	agree	strongly agree	agree	agree	strongly agree	strongly agree	strongly agree	strongly agree
211	22	Female	third	morning	Yes	4 - 6 years	Yes	permanent	afternoons	agree	strongly agree	strongly agree	agree	strongly agree	strongly agree	strongly agree	strongly agree	agree	strongly agree	agree	agree	agree
212	22	Female	third	morning	Yes	4 - 6 years	Yes	temporary	rotating	agree	agree	strongly agree	agree	agree	undecided	agree	agree	strongly agree	strongly agree	agree	agree	agree
213	24	Female	third	morning	Yes	More than 6 years	Yes	permanent	rotating	agree	strongly agree	strongly agree	strongly agree	agree	agree	agree	agree	strongly agree	strongly agree	strongly agree	agree	agree
214	21	Female	third	morning	Yes	Less than 2 years	Yes	temporary	afternoons	agree	strongly agree	agree	strongly agree	agree	agree	strongly agree	strongly agree	agree	strongly agree	agree	agree	agree
215	21	Female	third	morning	Yes	2 - 4 years	Yes	permanent	rotating	undecided	agree	agree	strongly agree	agree	undecided	strongly agree	agree	agree	agree	undecided	agree	strongly agree
216	27	Female	third	morning	Yes	More than 6 years	Yes	temporary	afternoons	agree	agree	agree	agree	agree	agree	agree	undecided	agree	agree	strongly agree	agree	undecided
217	27	Female	third	morning	Yes	2 - 4 years	Yes	temporary	nights	agree	agree	agree	agree	agree	agree	agree	agree	agree	agree	undecided	agree	agree
218	20	Male	third	morning	Yes	2 - 4 years	Yes	temporary	afternoons	agree	agree	agree	strongly agree	agree	agree	strongly agree	strongly agree	strongly agree	agree	strongly agree	agree	agree
219	23	Female	third	morning	Yes	4 - 6 years	Yes	temporary	nights	strongly agree	strongly agree	agree	strongly agree	agree	agree	strongly agree	strongly agree	strongly agree	strongly agree	strongly agree	strongly agree	strongly agree
220	21	Female	third	morning	Yes	Less than 2 years	Yes	temporary	afternoons	agree	agree	agree	agree	agree	agree	strongly agree	strongly agree	agree	strongly agree	strongly agree	strongly agree	strongly agree
221	20	Male	third	morning	Yes	2 - 4 years	Yes	temporary	rotating	strongly agree	strongly agree	strongly agree	strongly agree	strongly agree	agree	strongly agree	strongly agree	agree	agree	agree	strongly agree	strongly agree
222	25	Female	third	morning	Yes	4 - 6 years	Yes	permanent	afternoons	undecided	undecided	agree	disagree	agree	agree	agree	disagree	undecided	agree	strongly agree	agree	strongly agree
223	27	Female	third	morning	Yes	4 - 6 years	Yes	temporary	mornings	agree	agree	agree	agree	agree	agree	agree	agree	agree	strongly agree	agree	strongly agree	strongly agree
224	21	Female	third	morning	Yes	2 - 4 years	Yes	temporary	mornings	agree	agree	strongly agree	strongly agree	agree	undecided	strongly agree	strongly agree	strongly agree	strongly agree	agree	agree	agree
225	21	Female	third	morning	Yes	Less than 2 years	Yes	temporary	afternoons	agree	strongly agree	agree	agree	agree	agree	agree	agree	strongly agree	strongly agree	strongly agree	strongly agree	strongly agree
226	22	Female	third	morning	Yes	4 - 6 years	Yes	permanent	afternoons	agree	agree	agree	agree	agree	agree	agree	agree	agree	agree	agree	undecided	undecided
227	21	Female	third	morning	Yes	Less than 2 years	Yes	permanent	rotating	agree	agree	agree	agree	agree	agree	strongly agree	undecided	agree	strongly agree	agree	agree	strongly agree
228	24	Female	third	morning	Yes	More than 6 years	Yes	permanent	rotating	agree	agree	agree	agree	agree	undecided	agree	agree	agree	agree	undecided	agree	agree
229	35	Female	third	morning	Yes	More than 6 years	Yes	permanent	mornings	strongly agree	strongly agree	strongly agree	strongly agree	strongly agree	strongly agree	strongly agree	strongly agree	strongly agree	strongly agree	strongly agree	strongly agree	strongly agree
230	44	Male	third	morning	Yes	More than 6 years	Yes	permanent	afternoons	agree	agree	strongly agree	strongly agree	strongly agree	agree	strongly agree	agree	strongly agree	strongly agree	agree	agree	agree
231	21	Female	third	morning	Yes	Less than 2 years	Yes	temporary	mornings	agree	agree	agree	strongly agree	strongly agree	agree	agree	agree	agree	agree	strongly agree	strongly agree	strongly agree
232	22	Female	third	morning	Yes	2 - 4 years	Yes	temporary	nights	strongly agree	agree	agree	agree	agree	agree	strongly agree	agree	agree	strongly agree	strongly agree	agree	agree
233	21	Female	third	morning	Yes	2 - 4 years	Yes	temporary	mornings	strongly agree	agree	agree	agree	agree	agree	agree	undecided	agree	undecided	agree	agree	strongly agree
234	21	Male	third	morning	Yes	2 - 4 years	Yes	temporary	afternoons	agree	agree	strongly agree	agree	agree	agree	agree	strongly agree	agree	strongly agree	agree	strongly agree	agree
235	21	Male	third	morning	Yes	Less than 2 years	Yes	temporary	afternoons	undecided	agree	undecided	disagree	undecided	agree	agree	agree	agree	strongly agree	disagree	undecided	strongly agree
236	20	Female	third	morning	Yes	Less than 2 years	Yes	temporary	rotating	agree	agree	strongly agree	strongly agree	strongly agree	undecided	agree	strongly agree	strongly agree	strongly agree	agree	agree	strongly disagree
237	25	Female	third	morning	Yes	4 - 6 years	Yes	permanent	afternoons	agree	agree	agree	agree	agree	undecided	agree	agree	agree	agree	agree	agree	agree
238	29	Female	third	morning	Yes	More than 6 years	Yes	temporary	afternoons	strongly agree	strongly agree	strongly agree	strongly agree	strongly agree	agree	strongly agree	agree	strongly agree	strongly agree	strongly agree	agree	strongly agree
239	23	Female	third	morning	Yes	More than 6 years	Yes	permanent	afternoons	undecided	agree	agree	undecided	undecided	undecided	agree	agree	agree	undecided	agree	agree	agree
240	22	Female	third	morning	Yes	4 - 6 years	Yes	temporary	mornings	agree	agree	agree	agree	agree	undecided	agree	agree	agree	strongly agree	strongly agree	agree	strongly agree
241	27	Male	third	morning	Yes	4 - 6 years	Yes	temporary	afternoons	strongly agree	strongly agree	strongly agree	strongly agree	strongly agree	agree	strongly agree	strongly agree	strongly agree	strongly agree	strongly agree	strongly agree	strongly agree
242	21	Female	third	morning	Yes	2 - 4 years	Yes	temporary	afternoons	agree	strongly agree	strongly agree	undecided	agree	agree	strongly agree	undecided	agree	strongly agree	undecided	disagree	agree
243	43	Female	third	morning	Yes	More than 6 years	Yes	permanent	nights	agree	agree	strongly agree	agree	strongly agree	agree	agree	agree	strongly agree	strongly agree	strongly agree	strongly agree	agree
244	28	Female	third	morning	Yes	More than 6 years	Yes	temporary	afternoons	agree	agree	strongly agree	undecided	agree	undecided	agree	agree	undecided	undecided	agree	agree	undecided
245	29	Female	third	morning	Yes	More than 6 years	Yes	permanent	mornings	agree	agree	strongly agree	agree	agree	disagree	agree	undecided	agree	strongly agree	strongly agree	undecided	strongly agree
246	22	Female	third	morning	Yes	2 - 4 years	Yes	temporary	afternoons	strongly agree	strongly agree	strongly agree	strongly agree	strongly agree	strongly agree	strongly agree	strongly agree	strongly agree	strongly agree	strongly agree	strongly agree	strongly agree
247	21	Female	third	morning	Yes	Less than 2 years	Yes	temporary	nights	strongly agree	strongly agree	strongly agree	strongly agree	strongly agree	strongly agree	agree	strongly agree	strongly agree	strongly agree	agree	strongly agree	strongly agree
248	23	Female	third	morning	Yes	4 - 6 years	Yes	temporary	afternoons	strongly agree	strongly agree	agree	strongly agree	agree	agree	strongly agree	strongly agree	agree	strongly agree	strongly agree	strongly agree	strongly agree
249	20	Male	third	morning	Yes	2 - 4 years	Yes	temporary	nights	strongly agree	strongly agree	agree	agree	agree	undecided	agree	agree	undecided	agree	agree	agree	undecided
250	27	Female	third	morning	Yes	More than 6 years	Yes	temporary	mornings	agree	agree	agree	agree	agree	strongly agree	agree	strongly agree	strongly agree	strongly agree	strongly agree	strongly agree	strongly agree
251	41	Female	third	morning	Yes	More than 6 years	Yes	permanent	afternoons	agree	disagree	agree	undecided	undecided	disagree	agree	disagree	agree	agree	agree	undecided	undecided
252	22	Female	third	morning	Yes	4 - 6 years	Yes	temporary	afternoons	agree	strongly agree	agree	strongly agree	agree	undecided	agree	strongly agree	agree	strongly agree	undecided	agree	strongly agree
253	21	Female	third	morning	Yes	2 - 4 years	Yes	temporary	afternoons	agree	agree	undecided	agree	agree	agree	agree	agree	agree	undecided	agree	agree	strongly agree
254	21	Female	third	morning	Yes	4 - 6 years	Yes	temporary	afternoons	strongly agree	strongly agree	strongly agree	strongly agree	strongly agree	agree	strongly agree	strongly agree	strongly agree	strongly agree	strongly agree	strongly agree	strongly agree
255	21	Male	third	morning	Yes	2 - 4 years	Yes	temporary	rotating	agree	agree	agree	agree	agree	undecided	agree	agree	agree	strongly agree	strongly agree	strongly agree	undecided
256	24	Female	third	morning	Yes	More than 6 years	Yes	temporary	afternoons	agree	agree	agree	agree	agree	agree	strongly agree	strongly agree	agree	strongly agree	strongly agree	strongly agree	agree
257	21	Male	third	morning	Yes	2 - 4 years	Yes	temporary	nights	agree	strongly agree	strongly agree	agree	strongly agree	agree	strongly agree	strongly agree	strongly agree	agree	agree	strongly agree	strongly agree
258	24	Female	third	morning	Yes	More than 6 years	Yes	temporary	rotating	strongly agree	agree	strongly agree	strongly agree	strongly agree	strongly agree	agree	strongly agree	strongly agree	strongly agree	agree	strongly agree	agree
259	24	Male	third	morning	Yes	2 - 4 years	Yes	temporary	mornings	agree	agree	agree	agree	agree	strongly agree	agree	strongly agree	strongly agree	agree	agree	agree	agree
260	23	Female	fourth	morning	Yes	2 - 4 years	Yes	permanent	afternoons	strongly agree	strongly agree	strongly agree	strongly agree	strongly agree	undecided	agree	agree	strongly agree	strongly agree	strongly agree	strongly agree	strongly agree
261	21	Female	fourth	morning	Yes	4 - 6 years	Yes	temporary	afternoons	agree	strongly agree	strongly agree	strongly agree	strongly agree	undecided	strongly agree	strongly agree	strongly agree	strongly agree	strongly agree	strongly agree	agree
262	26	Female	fourth	morning	Yes	2 - 4 years	Yes	temporary	nights	agree	agree	agree	agree	agree	agree	agree	agree	agree	agree	agree	agree	agree
263	24	Female	fourth	morning	Yes	4 - 6 years	Yes	permanent	afternoons	agree	agree	agree	agree	undecided	agree	undecided	agree	agree	agree	agree	agree	agree
264	23	Female	fourth	morning	Yes	4 - 6 years	Yes	temporary	mornings	agree	agree	strongly agree	agree	agree	agree	agree	agree	strongly agree	agree	agree	agree	agree
265	21	Female	fourth	morning	Yes	2 - 4 years	Yes	temporary	mornings	agree	agree	agree	agree	agree	agree	undecided	undecided	undecided	agree	agree	agree	undecided
266	29	Female	fourth	morning	Yes	More than 6 years	Yes	temporary	rotating	agree	strongly agree	strongly agree	agree	strongly agree	agree	strongly agree	agree	agree	agree	strongly agree	agree	strongly agree
267	24	Female	fourth	morning	Yes	More than 6 years	Yes	permanent	afternoons	strongly agree	strongly agree	strongly agree	strongly agree	strongly agree	strongly agree	strongly agree	strongly agree	strongly agree	strongly agree	strongly agree	strongly agree	strongly agree
268	23	Male	fourth	morning	Yes	2 - 4 years	Yes	temporary	rotating	strongly agree	strongly agree	strongly agree	strongly agree	agree	agree	agree	agree	agree	agree	strongly agree	agree	agree
269	23	Female	fourth	morning	Yes	2 - 4 years	Yes	temporary	afternoons	undecided	undecided	agree	agree	agree	agree	undecided	agree	agree	agree	agree	agree	agree
270	29	Male	fourth	morning	Yes	More than 6 years	Yes	temporary	mornings	agree	agree	agree	strongly agree	strongly agree	strongly agree	strongly agree	strongly agree	strongly agree	agree	strongly agree	agree	strongly agree
271	26	Female	fourth	morning	Yes	More than 6 years	Yes	permanent	nights	strongly agree	strongly agree	agree	strongly agree	strongly agree	agree	strongly agree	agree	strongly agree	strongly agree	strongly agree	strongly agree	strongly agree
272	25	Female	fourth	morning	Yes	4 - 6 years	Yes	temporary	nights	agree	strongly agree	strongly agree	strongly agree	strongly agree	strongly agree	agree	agree	strongly agree	strongly agree	agree	strongly agree	strongly agree
273	24	Female	fourth	morning	Yes	4 - 6 years	Yes	permanent	afternoons	agree	strongly agree	strongly agree	strongly agree	strongly agree	agree	strongly agree	agree	agree	strongly agree	strongly agree	agree	strongly agree
274	28	Male	fourth	morning	Yes	4 - 6 years	Yes	temporary	nights	agree	agree	agree	strongly agree	strongly agree	agree	strongly agree	agree	agree	strongly agree	agree	strongly agree	agree
275	27	Male	fourth	morning	Yes	4 - 6 years	Yes	permanent	afternoons	undecided	agree	agree	undecided	undecided	agree	agree	strongly agree	strongly agree	agree	agree	agree	strongly agree
276	34	Male	fourth	morning	Yes	More than 6 years	Yes	permanent	mornings	agree	agree	strongly agree	strongly agree	agree	undecided	agree	agree	agree	strongly agree	agree	agree	agree
277	25	Female	fourth	morning	Yes	More than 6 years	Yes	permanent	afternoons	agree	agree	agree	agree	agree	agree	undecided	undecided	undecided	strongly agree	agree	undecided	strongly agree
278	28	Female	fourth	morning	Yes	More than 6 years	Yes	permanent	mornings	undecided	strongly agree	strongly agree	strongly agree	strongly agree	agree	agree	strongly agree	undecided	agree	agree	agree	agree
279	24	Female	fourth	morning	Yes	Less than 2 years	Yes	temporary	rotating	strongly agree	strongly agree	agree	strongly agree	agree	agree	strongly agree	strongly agree	agree	agree	strongly agree	agree	agree
280	21	Female	fourth	morning	Yes	2 - 4 years	Yes	permanent	afternoons	agree	agree	agree	agree	agree	undecided	strongly agree	undecided	strongly agree	undecided	strongly agree	agree	strongly agree
281	21	Female	fourth	morning	Yes	Less than 2 years	Yes	temporary	afternoons	agree	agree	agree	agree	agree	agree	agree	agree	agree	agree	agree	agree	agree
282	21	Female	fourth	morning	Yes	More than 6 years	Yes	permanent	afternoons	strongly agree	strongly agree	agree	agree	strongly agree	agree	agree	strongly agree	agree	strongly agree	agree	agree	agree
283	27	Female	fourth	morning	Yes	More than 6 years	Yes	permanent	afternoons	strongly agree	strongly agree	strongly agree	strongly agree	agree	agree	agree	strongly agree	strongly agree	strongly agree	strongly agree	strongly agree	strongly agree
284	27	Female	fourth	morning	Yes	More than 6 years	Yes	permanent	afternoons	agree	agree	agree	agree	agree	agree	agree	agree	agree	agree	agree	agree	agree
285	23	Female	fourth	morning	Yes	4 - 6 years	Yes	temporary	rotating	strongly agree	strongly agree	agree	strongly agree	agree	strongly agree	agree	strongly agree	strongly agree	agree	strongly agree	strongly agree	strongly agree
286	22	Female	fourth	morning	Yes	4 - 6 years	Yes	temporary	afternoons	agree	agree	agree	agree	agree	undecided	agree	undecided	agree	agree	undecided	agree	agree
287	25	Female	fourth	morning	Yes	More than 6 years	Yes	temporary	afternoons	strongly agree	strongly agree	strongly agree	strongly agree	strongly agree	agree	strongly agree	strongly agree	agree	agree	strongly agree	strongly agree	agree
288	21	Female	fourth	morning	Yes	2 - 4 years	Yes	temporary	afternoons	agree	agree	strongly agree	agree	agree	agree	agree	agree	agree	strongly agree	agree	agree	agree
289	30	Female	fourth	morning	Yes	More than 6 years	Yes	permanent	afternoons	agree	agree	agree	agree	agree	agree	agree	agree	agree	agree	agree	agree	agree
290	39	Female	fourth	morning	Yes	More than 6 years	Yes	permanent	nights	agree	agree	agree	agree	agree	agree	agree	agree	agree	agree	agree	agree	agree
291	22	Male	fourth	morning	Yes	4 - 6 years	Yes	temporary	rotating	agree	agree	agree	undecided	undecided	undecided	agree	agree	agree	strongly agree	agree	agree	agree
292	22	Male	fourth	morning	Yes	4 - 6 years	Yes	temporary	nights	strongly agree	agree	agree	agree	agree	undecided	strongly agree	agree	agree	undecided	strongly agree	agree	strongly agree
293	27	Female	fourth	morning	Yes	More than 6 years	Yes	permanent	afternoons	agree	agree	agree	agree	undecided	agree	agree	undecided	agree	strongly agree	strongly agree	agree	disagree
294	28	Male	fourth	morning	Yes	2 - 4 years	Yes	temporary	rotating	agree	agree	disagree	agree	agree	agree	agree	agree	agree	agree	agree	agree	disagree
295	24	Female	fourth	morning	Yes	More than 6 years	Yes	temporary	rotating	strongly agree	strongly agree	agree	strongly agree	agree	agree	undecided	agree	undecided	agree	undecided	undecided	undecided
296	21	Female	fourth	morning	Yes	2 - 4 years	Yes	permanent	afternoons	undecided	agree	strongly agree	agree	agree	undecided	agree	agree	agree	strongly agree	agree	agree	agree
297	20	Female	second	morning	No					agree	strongly agree	agree	strongly agree	strongly agree	agree	agree	agree	agree	strongly agree	agree	agree	agree
298	19	Female	second	morning	No					strongly agree	agree	agree	agree	strongly agree	agree	agree	strongly agree	strongly agree	strongly agree	agree	agree	agree
299	19	Male	second	morning	No					agree	strongly agree	strongly agree	strongly agree	strongly agree	agree	agree	strongly agree	strongly agree	agree	agree	agree	strongly agree
300	22	Female	second	afternoon	No					disagree	disagree	disagree	disagree	disagree	disagree	disagree	disagree	disagree	strongly disagree	undecided	disagree	disagree
301	20	Female	second	afternoon	No					strongly agree	strongly agree	strongly agree	agree	agree	agree	strongly agree	strongly agree	strongly agree	strongly agree	agree	strongly agree	strongly agree
302	21	Female	fourth	afternoon	No					agree	disagree	agree	agree	undecided	disagree	disagree	strongly disagree	agree	strongly agree	agree	undecided	agree
303	20	Female	second	afternoon	No					agree	agree	strongly agree	agree	agree	undecided	agree	agree	agree	undecided	agree	agree	agree
304	21	Male	second	afternoon	No					agree	agree	undecided	agree	undecided	disagree	agree	agree	strongly agree	strongly agree	strongly agree	strongly agree	strongly agree
305	21	Male	second	afternoon	No					strongly agree	strongly agree	agree	strongly agree	agree	strongly agree	strongly agree	strongly agree	strongly agree	strongly agree	strongly agree	strongly agree	agree
306	20	Female	second	afternoon	No					strongly agree	strongly agree	strongly agree	strongly agree	strongly agree	agree	strongly agree	strongly agree	strongly agree	strongly agree	strongly agree	strongly agree	undecided
307	19	Female	second	afternoon	No					agree	agree	agree	agree	agree	disagree	strongly agree	strongly agree	agree	agree	undecided	agree	undecided
308	20	Female	second	afternoon	No					agree	strongly agree	agree	strongly agree	undecided	undecided	strongly agree	strongly agree	strongly agree	strongly agree	strongly agree	agree	strongly agree
309	19	Female	second	afternoon	No					undecided	disagree	agree	undecided	agree	agree	agree	undecided	agree	agree	agree	agree	strongly agree
310	20	Female	second	afternoon	No					agree	strongly agree	strongly agree	agree	strongly agree	agree	strongly agree	strongly agree	strongly agree	strongly agree	agree	strongly agree	strongly agree
311	20	Female	second	afternoon	No					agree	agree	agree	undecided	agree	undecided	agree	disagree	undecided	disagree	disagree	strongly agree	strongly agree
312	19	Female	second	afternoon	No					agree	strongly agree	agree	strongly agree	strongly agree	undecided	strongly agree	strongly agree	strongly agree	strongly agree	disagree	disagree	agree
313	19	Female	second	afternoon	No					agree	agree	agree	agree	undecided	agree	agree	undecided	undecided	agree	disagree	disagree	strongly agree
314	19	Female	second	afternoon	No					agree	agree	agree	agree	agree	undecided	strongly agree	agree	agree	strongly agree	strongly agree	agree	strongly agree
315	20	Male	second	afternoon	No					agree	agree	agree	strongly agree	agree	agree	strongly agree	strongly agree	agree	strongly agree	undecided	undecided	strongly agree
316	20	Female	second	afternoon	No					agree	agree	agree	strongly agree	agree	agree	agree	undecided	agree	agree	strongly agree	agree	disagree
317	20	Female	second	afternoon	No					disagree	agree	agree	strongly agree	agree	undecided	strongly agree	agree	agree	strongly agree	agree	agree	strongly agree
318	19	Female	second	afternoon	No					strongly agree	strongly agree	strongly agree	strongly agree	agree	agree	strongly agree	strongly agree	strongly agree	strongly agree	agree	strongly agree	strongly agree
319	20	Female	second	afternoon	No					strongly agree	strongly agree	strongly agree	strongly agree	strongly agree	agree	strongly agree	strongly agree	strongly agree	strongly agree	strongly agree	strongly agree	strongly agree
320	18	Female	second	afternoon	No					strongly agree	agree	strongly agree	strongly agree	strongly agree	undecided	agree	strongly agree	strongly agree	strongly agree	agree	agree	undecided
321	19	Female	second	afternoon	No					agree	strongly agree	strongly agree	agree	strongly agree	agree	strongly agree	strongly agree	strongly agree	strongly agree	strongly agree	agree	agree
322	19	Female	second	afternoon	No					strongly agree	agree	agree	agree	agree	undecided	strongly agree	strongly agree	strongly agree	strongly agree	disagree	agree	undecided
323	18	Female	second	afternoon	No					strongly agree	strongly agree	agree	agree	strongly agree	undecided	agree	agree	agree	strongly agree	agree	agree	undecided
324	19	Female	second	afternoon	No					agree	strongly agree	strongly agree	agree	agree	agree	strongly agree	agree	agree	agree	strongly agree	agree	agree
325	21	Male	second	afternoon	No					strongly agree	strongly agree	strongly agree	strongly agree	agree	agree	strongly agree	strongly agree	strongly agree	strongly agree	undecided	strongly agree	disagree
326	18	Female	second	afternoon	No					strongly agree	strongly agree	agree	agree	agree	agree	strongly agree	strongly agree	strongly agree	strongly agree	agree	agree	agree
327	19	Male	second	afternoon	No					agree	strongly agree	strongly agree	strongly agree	strongly agree	agree	strongly agree	strongly agree	strongly agree	undecided	strongly agree	strongly agree	strongly agree
328	19	Female	second	afternoon	No					agree	strongly agree	strongly agree	agree	strongly agree	agree	strongly agree	strongly agree	agree	agree	undecided	agree	agree
329	19	Female	second	afternoon	No					agree	strongly agree	strongly agree	strongly agree	agree	undecided	strongly agree	strongly agree	agree	strongly agree	agree	agree	strongly agree
330	20	Female	third	afternoon	No					undecided	agree	agree	strongly agree	undecided	disagree	undecided	undecided	agree	agree	undecided	undecided	undecided
331	21	Female	third	afternoon	No					agree	agree	agree	agree	agree	undecided	agree	agree	agree	strongly agree	agree	agree	undecided
332	20	Female	third	afternoon	No					agree	agree	agree	strongly agree	agree	undecided	agree	agree	agree	agree	undecided	disagree	undecided
333	21	Female	third	afternoon	No					agree	agree	undecided	undecided	agree	undecided	agree	agree	undecided	agree	agree	undecided	agree
334	21	Female	third	afternoon	No					agree	strongly agree	agree	strongly agree	agree	agree	undecided	undecided	agree	strongly agree	agree	undecided	undecided
335	21	Female	third	afternoon	No					agree	undecided	undecided	agree	agree	agree	undecided	undecided	agree	undecided	agree	agree	agree
336	21	Female	third	afternoon	No					agree	agree	strongly agree	agree	undecided	agree	strongly agree	agree	strongly agree	strongly agree	strongly agree	agree	undecided
337	20	Female	third	afternoon	No					undecided	undecided	undecided	agree	agree	agree	undecided	disagree	agree	agree	agree	agree	strongly agree
338	21	Female	third	afternoon	No					agree	agree	agree	agree	agree	agree	undecided	undecided	agree	strongly agree	strongly agree	strongly agree	undecided
339	23	Female	third	afternoon	No					agree	undecided	agree	agree	undecided	agree	undecided	undecided	undecided	agree	strongly agree	agree	undecided
340	21	Male	third	afternoon	No					strongly agree	disagree	disagree	strongly agree	disagree	undecided	agree	agree	undecided	undecided	strongly agree	strongly agree	strongly agree
341	22	Female	third	afternoon	No					agree	agree	agree	agree	agree	agree	agree	agree	agree	agree	agree	agree	agree
342	25	Female	third	afternoon	No					agree	agree	agree	agree	agree	strongly agree	strongly agree	strongly agree	agree	strongly agree	undecided	agree	agree
343	24	Female	fourth	afternoon	No					agree	agree	agree	undecided	agree	undecided	agree	agree	agree	strongly agree	strongly agree	undecided	strongly agree
344	22	Female	fourth	afternoon	No					agree	agree	agree	agree	agree	agree	agree	agree	agree	strongly agree	agree	agree	agree
345	22	Female	fourth	afternoon	No					agree	agree	agree	agree	agree	agree	undecided	agree	agree	agree	strongly agree	strongly agree	agree
346	22	Female	fourth	afternoon	No					strongly agree	agree	agree	agree	agree	agree	strongly agree	agree	agree	agree	agree	strongly agree	agree
347	21	Female	fourth	afternoon	No					agree	agree	strongly agree	agree	agree	agree	agree	agree	agree	strongly agree	agree	undecided	agree
348	21	Female	fourth	afternoon	No					agree	agree	agree	agree	agree	agree	agree	agree	strongly agree	strongly agree	agree	agree	strongly agree
349	22	Female	fourth	afternoon	No					strongly disagree	strongly disagree	strongly disagree	strongly disagree	strongly disagree	disagree	disagree	disagree	disagree	disagree	disagree	disagree	disagree
350	24	Female	fourth	afternoon	No					agree	agree	strongly agree	agree	agree	agree	agree	agree	agree	strongly agree	strongly agree	agree	strongly agree
351	23	Female	fourth	afternoon	No					agree	agree	undecided	agree	agree	agree	agree	agree	agree	agree	strongly agree	agree	agree
352	22	Male	fourth	afternoon	No					agree	strongly agree	agree	strongly agree	strongly agree	agree	strongly agree	strongly agree	strongly agree	agree	agree	agree	strongly agree
353	24	Male	fourth	afternoon	No					strongly agree	strongly agree	agree	agree	strongly agree	undecided	agree	strongly agree	agree	strongly agree	agree	agree	strongly agree
354	26	Female	fourth	afternoon	No					agree	strongly agree	strongly agree	agree	agree	agree	strongly agree	agree	agree	agree	agree	agree	agree
355	22	Female	fourth	afternoon	No					strongly agree	strongly agree	strongly agree	strongly agree	agree	agree	agree	strongly agree	strongly agree	agree	undecided	undecided	agree
356	22	Female	fourth	afternoon	No					strongly agree	strongly agree	strongly agree	strongly agree	strongly agree	agree	strongly agree	strongly agree	strongly agree	agree	agree	agree	strongly agree
357	21	Female	fourth	afternoon	No					agree	strongly agree	agree	agree	agree	agree	strongly agree	agree	agree	agree	strongly agree	strongly agree	agree
358	23	Female	fourth	afternoon	No					strongly agree	strongly agree	strongly agree	strongly agree	strongly agree	strongly agree	strongly agree	strongly agree	strongly agree	strongly agree	strongly agree	strongly agree	strongly agree
359	21	Female	fourth	afternoon	No					agree	agree	strongly agree	agree	agree	agree	agree	agree	strongly agree	agree	agree	agree	agree
360	22	Female	fourth	afternoon	No					agree	agree	agree	agree	agree	undecided	agree	agree	agree	strongly agree	agree	agree	agree
361	23	Male	fourth	afternoon	No					agree	agree	strongly agree	agree	agree	undecided	agree	agree	strongly agree	strongly agree	strongly agree	strongly agree	agree
362	21	Female	second	morning	No					agree	agree	agree	undecided	agree	undecided	agree	agree	agree	undecided	agree	agree	strongly agree
363	20	Male	second	morning	No					agree	agree	undecided	agree	undecided	undecided	strongly agree	agree	agree	strongly agree	undecided	agree	agree
364	19	Female	second	morning	No					strongly agree	agree	agree	agree	agree	agree	agree	agree	agree	strongly agree	agree	agree	undecided
365	19	Female	second	morning	No					strongly agree	strongly agree	agree	strongly agree	agree	agree	strongly agree	strongly agree	strongly agree	strongly agree	strongly agree	strongly agree	disagree
366	20	Female	second	morning	No					strongly agree	agree	strongly agree	strongly agree	strongly agree	undecided	agree	agree	agree	undecided	agree	agree	undecided
367	20	Female	second	morning	No					agree	strongly agree	agree	strongly agree	strongly agree	undecided	strongly agree	strongly agree	strongly agree	agree	strongly agree	agree	strongly agree
368	19	Female	second	morning	No					agree	agree	agree	strongly agree	agree	undecided	strongly agree	agree	agree	strongly agree	agree	agree	agree
369	20	Male	second	morning	No					agree	agree	agree	strongly agree	strongly agree	agree	agree	undecided	agree	agree	agree	undecided	agree
370	19	Female	second	morning	No					undecided	agree	agree	agree	undecided	undecided	agree	undecided	agree	undecided	agree	undecided	disagree
371	22	Female	second	morning	No					agree	agree	agree	agree	undecided	agree	strongly agree	agree	agree	agree	undecided	undecided	agree
372	19	Female	second	morning	No					agree	agree	undecided	undecided	undecided	agree	agree	agree	undecided	strongly agree	undecided	undecided	agree
373	22	Female	second	morning	No					agree	agree	agree	agree	agree	undecided	agree	undecided	agree	agree	agree	agree	agree
374	20	Female	second	morning	No					agree	agree	agree	agree	strongly agree	agree	strongly agree	strongly agree	agree	strongly agree	strongly agree	strongly agree	agree
375	20	Female	second	morning	No					agree	agree	agree	strongly agree	agree	undecided	agree	strongly agree	strongly agree	agree	agree	agree	agree
376	19	Female	second	morning	No					agree	agree	strongly agree	agree	agree	agree	strongly agree	strongly agree	strongly agree	strongly agree	agree	agree	strongly agree
377	20	Female	second	morning	No					agree	strongly agree	agree	agree	strongly agree	undecided	strongly agree	strongly agree	agree	strongly agree	strongly agree	strongly agree	strongly agree
378	23	Female	second	morning	No					agree	agree	agree	agree	agree	agree	agree	agree	agree	agree	agree	agree	agree
379	20	Female	second	morning	No					agree	strongly agree	agree	agree	agree	agree	agree	agree	strongly agree	strongly agree	strongly agree	strongly agree	agree
380	19	Female	second	morning	No					agree	agree	agree	agree	strongly agree	agree	strongly agree	agree	strongly agree	agree	undecided	agree	agree
381	21	Female	second	morning	No					undecided	strongly agree	strongly agree	strongly agree	strongly agree	undecided	agree	agree	strongly agree	agree	undecided	agree	undecided
382	20	Male	second	morning	No					agree	agree	agree	agree	agree	agree	undecided	agree	agree	strongly agree	strongly agree	agree	agree
383	20	Female	second	morning	No					agree	agree	agree	agree	agree	undecided	undecided	agree	agree	agree	undecided	undecided	undecided
384	20	Female	second	morning	No					agree	strongly agree	agree	agree	agree	agree	strongly agree	agree	agree	strongly agree	agree	agree	strongly agree
385	20	Female	second	morning	No					strongly agree	agree	agree	strongly agree	strongly agree	agree	agree	strongly agree	agree	strongly agree	agree	disagree	undecided
386	20	Female	second	morning	No					agree	agree	agree	agree	agree	undecided	agree	agree	agree	agree	agree	agree	agree
387	19	Female	second	morning	No					strongly agree	strongly agree	agree	strongly agree	strongly agree	agree	strongly agree	strongly agree	agree	strongly agree	strongly agree	strongly agree	strongly agree
388	19	Female	second	morning	No					undecided	agree	agree	agree	agree	agree	agree	agree	agree	agree	agree	agree	undecided
389	20	Female	second	morning	No					agree	agree	agree	agree	agree	agree	agree	agree	strongly agree	strongly agree	strongly agree	strongly agree	strongly agree
390	21	Female	second	morning	No					agree	undecided	agree	undecided	undecided	disagree	agree	undecided	undecided	undecided	undecided	undecided	undecided
391	19	Female	second	morning	No					agree	agree	strongly agree	agree	agree	agree	agree	strongly agree	strongly agree	agree	strongly agree	agree	agree
392	19	Male	second	morning	No					strongly agree	agree	strongly agree	strongly agree	strongly agree	agree	agree	agree	strongly agree	agree	strongly agree	strongly agree	strongly agree
393	19	Female	second	morning	No					strongly agree	strongly agree	strongly agree	agree	strongly agree	undecided	strongly agree	strongly agree	strongly agree	agree	strongly agree	agree	undecided
394	19	Female	second	morning	No					strongly agree	strongly agree	strongly agree	agree	strongly agree	agree	strongly agree	strongly agree	agree	strongly agree	strongly agree	agree	agree
395	19	Female	second	morning	No					agree	agree	agree	agree	strongly agree	agree	strongly agree	strongly agree	strongly agree	strongly agree	strongly agree	strongly agree	strongly agree
396	20	Female	second	morning	No					strongly agree	strongly agree	strongly agree	strongly agree	strongly agree	strongly agree	strongly agree	strongly agree	strongly agree	strongly agree	strongly agree	strongly agree	strongly agree
397	21	Female	second	morning	No					strongly agree	strongly agree	strongly agree	strongly agree	strongly agree	strongly agree	agree	agree	strongly agree	agree	agree	strongly agree	agree
398	23	Female	second	morning	No					agree	agree	agree	agree	agree	agree	agree	agree	agree	strongly agree	strongly agree	agree	agree
399	18	Female	second	morning	No					agree	agree	strongly agree	agree	agree	undecided	agree	agree	agree	agree	agree	undecided	disagree
400	19	Female	second	morning	No					strongly agree	strongly agree	agree	strongly agree	agree	agree	agree	agree	strongly agree	undecided	agree	strongly agree	agree
401	18	Female	second	morning	No					agree	agree	agree	strongly agree	strongly agree	agree	strongly agree	agree	strongly agree	strongly agree	agree	agree	agree
402	19	Female	second	morning	No					strongly agree	strongly agree	strongly agree	agree	strongly agree	strongly agree	agree	agree	strongly agree	strongly agree	strongly agree	agree	agree
403	19	Female	second	morning	No					agree	strongly agree	agree	agree	agree	undecided	undecided	undecided	agree	disagree	agree	agree	agree
404	19	Female	second	morning	No					agree	agree	agree	agree	strongly agree	undecided	strongly agree	strongly agree	strongly agree	strongly agree	strongly agree	strongly agree	strongly agree
405	19	Female	second	morning	No					strongly agree	strongly agree	strongly agree	strongly agree	agree	strongly agree	strongly agree	strongly agree	strongly agree	strongly agree	strongly agree	strongly agree	strongly agree
406	19	Female	second	morning	No					agree	agree	strongly agree	strongly agree	agree	undecided	agree	agree	agree	strongly agree	strongly agree	strongly agree	agree
407	19	Female	second	morning	No					strongly agree	strongly agree	agree	strongly agree	agree	agree	strongly agree	strongly agree	agree	strongly agree	agree	agree	agree
408	19	Female	second	morning	No					strongly agree	strongly agree	strongly agree	strongly agree	strongly agree	agree	strongly agree	strongly agree	strongly agree	strongly agree	strongly agree	agree	strongly agree
409	20	Male	second	morning	No					strongly agree	strongly agree	strongly agree	strongly agree	agree	undecided	strongly agree	strongly agree	strongly agree	strongly agree	agree	agree	strongly agree
410	19	Female	second	morning	No					agree	agree	agree	strongly agree	agree	agree	strongly agree	agree	strongly agree	strongly agree	agree	agree	undecided
411	19	Female	second	morning	No					strongly disagree	disagree	strongly disagree	disagree	strongly disagree	disagree	strongly disagree	strongly disagree	strongly disagree	strongly disagree	disagree	disagree	disagree
412	19	Female	second	morning	No					strongly agree	strongly agree	strongly agree	strongly agree	strongly agree	agree	strongly agree	strongly agree	strongly agree	strongly agree	agree	strongly agree	agree
413	19	Female	second	morning	No					strongly agree	strongly agree	strongly agree	agree	strongly agree	agree	strongly agree	strongly agree	strongly agree	agree	strongly agree	strongly agree	agree
414	18	Female	second	morning	No					strongly agree	strongly agree	strongly agree	agree	strongly agree	agree	strongly agree	strongly agree	strongly agree	agree	undecided	undecided	agree
415	19	Female	second	morning	No					strongly agree	strongly agree	strongly agree	strongly agree	strongly agree	agree	strongly agree	strongly agree	strongly agree	agree	agree	agree	agree
416	19	Female	second	morning	No					agree	strongly agree	strongly agree	agree	strongly agree	agree	strongly agree	agree	agree	strongly agree	agree	agree	strongly agree
417	19	Female	second	morning	No					agree	strongly agree	agree	agree	agree	agree	agree	agree	strongly agree	agree	agree	agree	agree
418	19	Female	second	morning	No					strongly agree	strongly agree	strongly agree	strongly agree	strongly agree	agree	strongly agree	agree	strongly agree	agree	strongly agree	strongly agree	agree
419	21	Male	third	morning	No					agree	strongly agree	agree	agree	agree	agree	strongly agree	strongly agree	strongly agree	agree	agree	agree	strongly agree
420	20	Female	third	morning	No					strongly agree	strongly agree	agree	strongly agree	agree	agree	strongly agree	strongly agree	strongly agree	agree	agree	agree	agree
421	25	Female	third	morning	No					agree	strongly agree	agree	agree	agree	agree	strongly agree	strongly agree	strongly agree	strongly agree	strongly agree	strongly agree	strongly agree
422	22	Male	third	morning	No					agree	strongly agree	strongly agree	agree	agree	strongly agree	strongly agree	strongly agree	agree	strongly agree	strongly agree	strongly agree	agree
423	21	Female	third	morning	No					agree	agree	agree	agree	agree	undecided	undecided	agree	agree	agree	agree	agree	agree
424	21	Female	third	morning	No					agree	strongly agree	disagree	agree	disagree	strongly agree	strongly agree	agree	disagree	strongly agree	agree	strongly agree	strongly agree
425	21	Female	third	morning	No					agree	agree	agree	agree	undecided	agree	agree	agree	undecided	agree	agree	agree	agree
426	20	Male	third	morning	No					agree	agree	agree	disagree	agree	agree	agree	agree	undecided	strongly agree	strongly agree	strongly agree	agree
427	21	Female	third	morning	No					agree	agree	strongly agree	strongly agree	strongly agree	agree	agree	strongly agree	strongly agree	strongly agree	agree	agree	strongly agree
428	22	Female	third	morning	No					strongly agree	strongly agree	strongly agree	agree	strongly agree	agree	strongly agree	strongly agree	strongly agree	strongly agree	agree	strongly agree	agree
429	20	Female	third	morning	No					agree	strongly agree	strongly agree	strongly agree	strongly agree	agree	agree	strongly agree	strongly agree	strongly agree	agree	agree	agree
430	21	Female	third	morning	No					agree	agree	agree	agree	undecided	undecided	agree	undecided	agree	agree	agree	agree	agree
431	20	Female	third	morning	No					agree	strongly agree	agree	agree	agree	undecided	agree	agree	agree	strongly agree	strongly agree	agree	agree
432	21	Female	third	morning	No					agree	agree	strongly agree	agree	strongly agree	disagree	agree	undecided	agree	agree	undecided	agree	agree
433	24	Female	fourth	morning	No					strongly agree	strongly agree	agree	agree	agree	agree	agree	agree	agree	agree	strongly agree	agree	agree
434	21	Female	fourth	morning	No					agree	agree	agree	agree	agree	undecided	agree	agree	undecided	agree	agree	agree	agree
435	23	Female	fourth	morning	No					strongly agree	strongly agree	strongly agree	strongly agree	strongly agree	undecided	agree	agree	strongly agree	strongly agree	strongly agree	agree	strongly agree
436	23	Female	fourth	morning	No					agree	strongly agree	strongly agree	agree	agree	agree	strongly agree	strongly agree	agree	strongly agree	strongly agree	agree	agree
437	21	Female	fourth	morning	No					agree	agree	agree	undecided	undecided	undecided	agree	undecided	agree	agree	undecided	agree	undecided
438	23	Female	fourth	morning	No					agree	agree	agree	agree	agree	undecided	agree	agree	undecided	agree	agree	undecided	agree
439	22	Female	fourth	morning	No					agree	strongly agree	strongly agree	strongly agree	agree	agree	strongly agree	agree	strongly agree	strongly agree	agree	agree	agree
440	22	Female	fourth	morning	No					agree	strongly agree	agree	agree	agree	agree	agree	strongly agree	agree	agree	undecided	agree	agree
441	22	Female	fourth	morning	No					agree	agree	strongly agree	agree	strongly agree	undecided	agree	agree	strongly agree	strongly agree	strongly agree	agree	agree
442	23	Female	fourth	morning	No					strongly agree	strongly agree	strongly agree	strongly agree	strongly agree	agree	strongly agree	strongly agree	strongly agree	strongly agree	strongly agree	strongly agree	agree
443	21	Female	fourth	morning	No					strongly agree	strongly agree	strongly agree	strongly agree	strongly agree	strongly agree	strongly agree	strongly agree	strongly agree	strongly agree	strongly agree	strongly agree	strongly agree
444	22	Female	fourth	morning	No					agree	strongly agree	strongly agree	strongly agree	strongly agree	strongly agree	strongly agree	agree	agree	agree	strongly agree	agree	strongly agree
445	21	Female	second	afternoon	No					strongly agree	strongly agree	agree	strongly agree	strongly agree	undecided	agree	strongly agree	strongly agree	strongly agree	strongly agree	agree	strongly agree
446	23	Female	second	afternoon	No					agree	strongly agree	agree	agree	agree	undecided	agree	agree	strongly agree	strongly agree	agree	agree	agree
447	21	Female	second	afternoon	No					agree	agree	undecided	agree	undecided	undecided	disagree	disagree	disagree	strongly agree	agree	agree	agree
448	21	Female	second	afternoon	No					agree	agree	undecided	agree	agree	agree	agree	strongly agree	agree	agree	agree	agree	agree
449	21	Male	second	afternoon	No					agree	agree	strongly agree	agree	strongly agree	agree	strongly agree	agree	agree	strongly agree	agree	agree	disagree
450	19	Female	second	afternoon	No					strongly agree	strongly agree	strongly agree	strongly agree	strongly agree	undecided	strongly agree	strongly agree	strongly agree	strongly agree	agree	agree	strongly agree
451	21	Female	second	afternoon	No					agree	agree	agree	agree	agree	undecided	agree	agree	agree	agree	agree	agree	agree
452	37	Female	second	afternoon	No					strongly agree	strongly agree	strongly agree	agree	agree	strongly agree	strongly agree	strongly agree	strongly agree	strongly agree	strongly agree	strongly agree	strongly agree
453	39	Male	third	afternoon	No					agree	strongly agree	strongly agree	strongly agree	strongly agree	agree	agree	agree	agree	agree	agree	agree	strongly agree
454	25	Female	third	afternoon	No					agree	agree	agree	agree	agree	agree	agree	agree	agree	agree	agree	agree	agree
455	21	Female	third	afternoon	No					agree	agree	agree	agree	agree	undecided	agree	agree	agree	agree	agree	agree	agree
456	20	Female	third	afternoon	No					agree	strongly agree	agree	agree	agree	agree	agree	agree	strongly agree	strongly agree	strongly agree	agree	agree
457	23	Female	fourth	afternoon	No					strongly agree	strongly agree	strongly agree	strongly agree	strongly agree	strongly agree	strongly agree	strongly agree	strongly agree	strongly agree	strongly agree	strongly agree	strongly agree
458	24	Female	fourth	afternoon	No					agree	strongly agree	agree	agree	undecided	agree	agree	strongly agree	strongly agree	agree	strongly agree	agree	undecided
459	23	Female	fourth	afternoon	No					agree	agree	agree	agree	agree	agree	agree	agree	agree	strongly agree	agree	agree	agree
460	28	Female	fourth	afternoon	No					strongly agree	strongly agree	agree	agree	agree	agree	strongly agree	agree	strongly agree	agree	agree	agree	agree
461	21	Female	fourth	afternoon	No					agree	strongly agree	strongly agree	agree	strongly agree	agree	strongly agree	strongly agree	agree	agree	strongly agree	agree	undecided
462	38	Male	fourth	afternoon	No					undecided	disagree	agree	disagree	undecided	agree	agree	agree	strongly agree	strongly agree	agree	strongly agree	strongly agree
463	22	Female	fourth	afternoon	No					strongly agree	agree	agree	strongly agree	strongly agree	agree	strongly agree	strongly agree	strongly agree	agree	strongly agree	strongly agree	agree
464	21	Female	fourth	afternoon	No					agree	strongly agree	agree	strongly agree	agree	undecided	agree	agree	agree	agree	agree	agree	agree
465	21	Female	fourth	afternoon	No					strongly agree	strongly agree	agree	agree	agree	agree	strongly agree	strongly agree	agree	strongly agree	strongly agree	strongly agree	agree
466	23	Male	fourth	afternoon	No					disagree	agree	agree	agree	undecided	agree	undecided	undecided	agree	strongly agree	strongly agree	strongly agree	agree
467	23	Female	fourth	afternoon	No					strongly disagree	disagree	strongly disagree	disagree	disagree	disagree	disagree	disagree	disagree	strongly disagree	disagree	strongly disagree	disagree
468	24	Male	second	morning	No					agree	agree	agree	strongly agree	agree	agree	strongly agree	strongly agree	strongly agree	agree	agree	agree	strongly agree
469	19	Female	second	morning	No					agree	strongly agree	strongly agree	agree	strongly agree	agree	agree	agree	agree	agree	agree	agree	agree
470	30	Female	third	morning	No					agree	agree	agree	agree	agree	agree	agree	agree	agree	agree	agree	agree	agree
471	26	Female	third	morning	No					undecided	agree	disagree	agree	undecided	undecided	agree	undecided	agree	strongly agree	agree	agree	agree
472	25	Female	third	morning	No					strongly agree	agree	agree	agree	agree	undecided	strongly agree	strongly agree	strongly agree	strongly agree	strongly agree	strongly agree	agree
473	22	Female	third	morning	No					agree	strongly agree	undecided	agree	agree	undecided	strongly agree	agree	undecided	agree	strongly agree	strongly agree	strongly agree
474	29	Female	third	morning	No					undecided	strongly agree	strongly agree	strongly agree	strongly agree	disagree	agree	agree	strongly agree	strongly agree	strongly agree	agree	agree
475	20	Female	third	morning	No					agree	agree	agree	strongly agree	strongly agree	agree	agree	disagree	agree	strongly agree	agree	agree	strongly agree
476	21	Female	third	morning	No					strongly agree	strongly agree	agree	agree	strongly agree	agree	strongly agree	undecided	agree	agree	strongly agree	undecided	undecided
477	21	Female	third	morning	No					agree	agree	agree	strongly agree	agree	undecided	agree	agree	agree	agree	agree	agree	agree
478	23	Female	fourth	morning	No					agree	agree	agree	strongly agree	strongly agree	agree	agree	agree	agree	agree	agree	agree	agree
479	23	Female	fourth	morning	No					agree	agree	strongly agree	strongly agree	agree	agree	strongly agree	agree	agree	agree	strongly agree	agree	strongly agree
480	26	Female	fourth	morning	No					agree	strongly agree	agree	agree	strongly agree	undecided	strongly agree	strongly agree	agree	strongly agree	strongly agree	strongly agree	agree
481	23	Female	fourth	morning	No					agree	strongly agree	strongly agree	strongly agree	strongly agree	agree	agree	agree	agree	agree	agree	agree	agree
482	24	Female	fourth	morning	No					strongly agree	strongly agree	agree	agree	agree	agree	agree	agree	agree	agree	agree	agree	agree
483	22	Female	fourth	morning	No					agree	agree	agree	agree	agree	undecided	undecided	undecided	agree	agree	strongly agree	agree	agree
484	53	Male	fourth	morning	No					agree	strongly agree	agree	strongly agree	strongly agree	agree	strongly agree	agree	undecided	strongly agree	undecided	agree	agree
485	23	Female	fourth	morning	No					disagree	disagree	disagree	disagree	disagree	disagree	disagree	disagree	disagree	disagree	disagree	disagree	disagree
486	22	Male	fourth	morning	No					agree	agree	strongly agree	agree	strongly agree	undecided	agree	agree	agree	strongly agree	strongly agree	agree	strongly agree
487	21	Female	fourth	morning	No					agree	strongly agree	undecided	agree	agree	agree	undecided	strongly agree	agree	agree	agree	agree	agree
488	22	Female	fourth	morning	No					agree	agree	agree	agree	agree	agree	agree	undecided	agree	agree	strongly agree	agree	undecided
489	23	Male	fourth	morning	No					strongly agree	agree	agree	strongly agree	agree	agree	agree	strongly agree	agree	strongly agree	strongly agree	agree	agree
